# Supplementary material for: Selenium effects on arsenic cytotoxicity and protein phosphorylation in human kidney cells using chip-based nanoLC-MS/MS
Source: Royal Society of Chemistry journal article supplement (doi:10.1039/c0mt00110d), 2011-01-01
Supplement: c0mt00110d.pdf [file c0mt00110d.pdf]

## Electronic Supporting Material

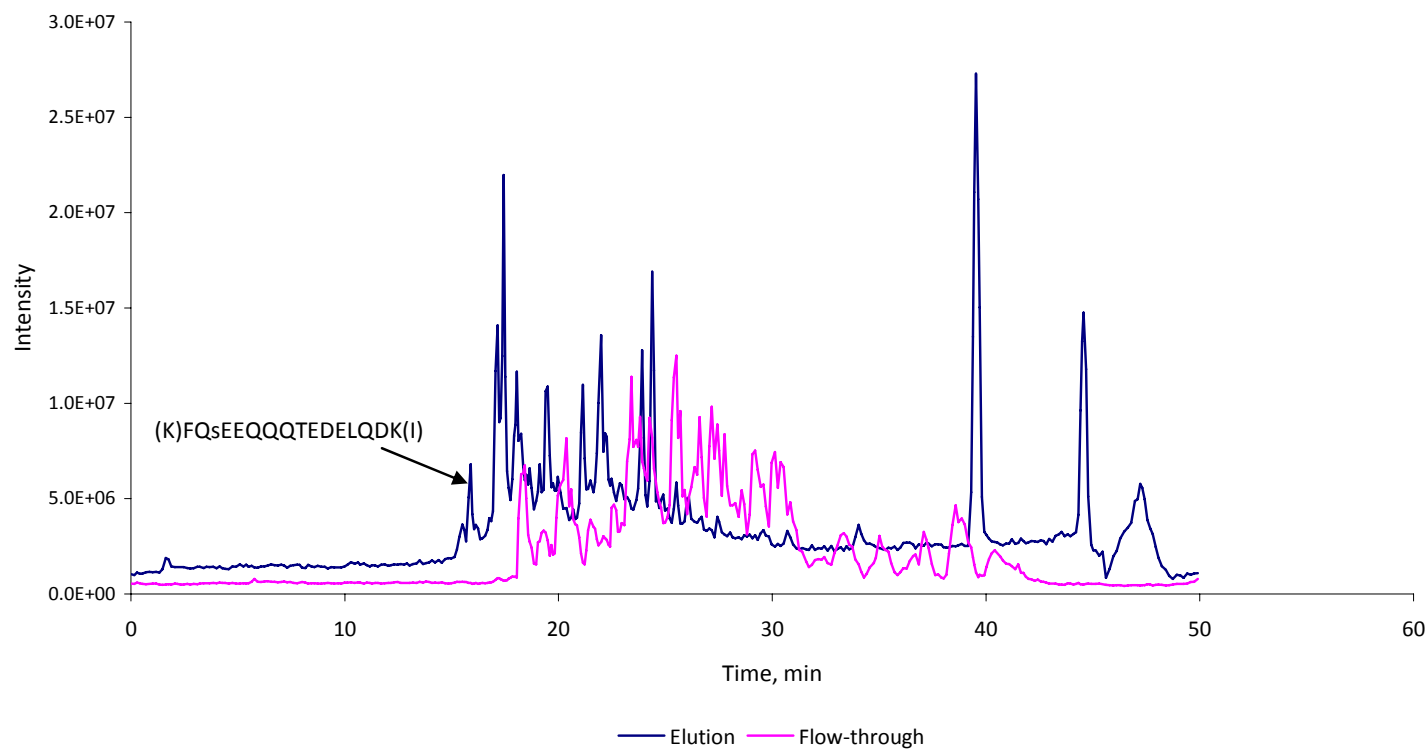

**Supplement 1.** Figure 1. Base peak chromatograms of flow-through and elution operated at 100 nM  $\beta$ -casein and BSA protein mixture obtained by phosphochip<sup>®</sup> coupled to NanoLC-Chip/ITMS system. As shown in Figure 1 the peak at 16 min which belongs to  $\beta$ -casein does not appear at the flow-through chromatogram but on the other hand by injecting elution buffer  $\beta$ -casein eluted from TiO<sub>2</sub> column and the  $\beta$ -casein peak is observed at the elution chromatogram.

## Supplement 2.

The results for  $\beta$ -casein obtained from both search engines gave the same singly phosphorylated peptide on serine (K)FQsEEQQQTEDELQDK(I) and the phosphorylation was on site 50S of the protein. Also as expected  $\beta$ -casein could not be identified with both search engines using the data obtained from flow-through chromatogram. Spectrum Mill results for BSA using flow-through chromatogram resulted in 9 matching peptides; however Mascot gave 12 matched peptides for the same data. When elution chromatogram was searched with both search engines, Spectrum Mill and Mascot gave 3 and 4 matched peptides, respectively for BSA (Table 1). These results showed that some of the non-phosphorylated peptides could be retained on the TiO<sub>2</sub> column and eluted with elution buffer. Similar results were obtained by different groups and they indicated that these non-phosphorylated peptides in the elution chromatogram are highly acidic in nature and contamination with acidic peptides represents a common issue in phosphorylated peptide enrichment, based on metal co-ordination<sup>21, 30, 31</sup>. Nevertheless it is still advantageous to perform TiO<sub>2</sub> enrichment to improve detection of phosphorylated peptides due to low abundance of many phosphorylated peptides.

### References to this supplement 2. (numbers are from the manuscript reference list)

- 21.** S. B. Ficarro, M. L. McClelland, P. T. Stukenberg, D. J. Burke, M. M. Ross, J. Shabanowitz, D. F. Hunt and F. M. White, "Phosphoproteome analysis by mass spectrometry and its application to *Saccharomyces cerevisiae*," *Nature biotechnology* **20**, 301-305 (2002).
- 30.** S. Mohammed, K. Kraiczek, M. W. H. Pinkse, S. Lemeer, J. J. Benschop and A. J. R. Heck, "Chip-based enrichment and NanoLC-MS/MS analysis of phosphopeptides from whole lysates," *Journal of Proteome Research* **7**, 1565-1571 (2008).
- 31.** R. Raijmakers, K. Kraiczek, A. P. De Jong, S. Mohammed and A. J. R. Heck, "Exploring the human leukocyte phosphoproteome using a microfluidic reversed-phase-TiO<sub>2</sub> reversed-phase high-performance liquid chromatography phosphochip coupled to a quadrupole time-of-flight mass spectrometer," *Analytical Chemistry* **82**, 824-832 (2010).

**Table 1.** Comparison of flow-through and elution chromatogram results using Spectrum Mill and Mascot database search engines

| Spectrum Mill results     |                    |                                                                                                                                                                                                                                                                                                           |               |                      |                    |                                                                             |               |
|---------------------------|--------------------|-----------------------------------------------------------------------------------------------------------------------------------------------------------------------------------------------------------------------------------------------------------------------------------------------------------|---------------|----------------------|--------------------|-----------------------------------------------------------------------------|---------------|
| Flow-through Chromatogram |                    |                                                                                                                                                                                                                                                                                                           |               | Elution Chromatogram |                    |                                                                             |               |
| Total Score               | # matched peptides | Peptide sequence                                                                                                                                                                                                                                                                                          | Protein name  | Score                | # matched peptides | Peptide sequence                                                            | Protein name  |
| -                         | -                  | -                                                                                                                                                                                                                                                                                                         | -             | 20                   | 1                  | (K)FQsEEQQQTEDELQDK(I)                                                      | β-casein      |
| 92                        | 9                  | (K)CCAADDKEACFAVEGPK(L)<br>(K)DAFLGSFLYEYSR(R)<br>(K)DAIPENLPPLTADFAEDK(D)<br>(R)ETYGDMADCCEK(Q)<br>(K)GLVLIAFSQYLQQCPFDEHVK(L)<br>(K)LFTFHADICTLPDTEEK(Q)<br>(R)MPCTEDYLSLILNR(L)<br>(R)RHPYFYAPELLYYANK(Y)<br>(K)SHCIAEVEKDAIPENLPPLTADFAEDK(D)                                                         | Serum albumin | 38                   | 3                  | (K)LVNELTEFAK(T)<br>(K)DLGEEHFK(G)<br>(K)AEFVEVTK(L)                        | Serum albumin |
| Mascot results            |                    |                                                                                                                                                                                                                                                                                                           |               |                      |                    |                                                                             |               |
| Flow-through Chromatogram |                    |                                                                                                                                                                                                                                                                                                           |               | Elution Chromatogram |                    |                                                                             |               |
| Total Score               | # matched peptides | Peptide sequence                                                                                                                                                                                                                                                                                          | Protein name  | Score                | # matched peptides | Peptide sequence                                                            | Protein name  |
| -                         | -                  | -                                                                                                                                                                                                                                                                                                         | -             | 74                   | 1                  | (K)FQsEEQQQTEDELQDK(I)                                                      | β-casein      |
| 247                       | 12                 | (K)HLVDEPQNLIK(Q)<br>(K)SLHTLFGDELCK(V)<br>(K)DAFLGSFLYEYSR(R)<br>(R)ETYGDMADCCEK(Q)<br>(R)MPCTEDYLSLILNR(L)<br>(R)HPYFYAPELLYYANK(Y)<br>(R)NECFLSHKDDSPDLPK(L)<br>(K)LFTFHADICTLPDTEK(Q)<br>(K)CCAADDKEACFAVEGPK(L)<br>(K)DAIPENLPPLTADFAEDK(D)<br>(R)RHPYFYAPELLYYANK(Y)<br>(K)GLVLIAFSQYLQQCPFDEHVK(L) | Serum albumin | 93                   | 4                  | (K)LVNELTEFAK(T)<br>(K)DLGEEHFK(G)<br>(K)AEFVEVTK(L)<br>(K)DDPHACYSTVFDK(L) | Serum albumin |

**Supplement 3.** Table 2. Phosphorylated protein results obtained by Spectrum Mill and Mascot (100µM SeMet + 30µM iAs inoculated cell lysate)

|   | <b>Spectrum Mill Score</b> | <b>Mascot Score</b> | <b>Access #*</b>       | <b>Peptide Sequence</b>                                               | <b>Variable Sites found in the study**</b>      | <b>UniprotKB Reported Variable Sites***</b>          | <b>Protein Name</b>                             | <b>Function (this column represents abbreviated and paraphrased information from the UniprotKB database for each protein report and is obtained through the access # link in Row D of this table).</b> |
|---|----------------------------|---------------------|------------------------|-----------------------------------------------------------------------|-------------------------------------------------|------------------------------------------------------|-------------------------------------------------|--------------------------------------------------------------------------------------------------------------------------------------------------------------------------------------------------------|
| 1 | 21.19                      | 57                  | <a href="#">P46060</a> | (R)YQDEVFGGFVtEPQEEsEEVEEPEER(Q)<br>-----<br>(K)sssPAPADIAQTVQEDLR(T) | S149s<br>T143t<br><br>S230s,<br>S231s,<br>S232s | <b>S</b> : 149, 230, 231, 371<br><b>T</b> : 143, 266 | Ras GTPase-activating protein-binding protein 1 | GTPase activator for the nuclear Ras-related regulatory protein Ran. Phosphorylated occurs before nuclear envelope breakdown and continues throughout mitosis.                                         |
| 2 | 13.95                      | 61                  | <a href="#">P54105</a> | (K)FEEESKEPVADDEEEDsDDDVEPITEFR(F)                                    | S102s                                           | <b>S</b> : 102, 193<br><b>T</b> : 223                | Methylosome subunit pICln                       | Inhibits the binding of survival motor neuron protein (SMN) to Sm proteins. May participate in cellular volume control. Phosphorylated upon DNA damage, probably by ATM or ATR                         |
| 3 | 13.61                      | 54                  | <a href="#">P05388</a> | (K)EEsEEsDEDMGFGLFD(-)                                                | S304s<br>S307s                                  | <b>S</b> : 304, 307<br><b>T</b> : 24                 | 60S acidic ribosomal protein P0 (L10E)          | Equivalent function to E.coli protein L10                                                                                                                                                              |
| 4 | 13.37                      | 48                  | <a href="#">P13861</a> | (K)GDsEsEEDEDLEVPVPSR(F)                                              | S78s,<br>S80s                                   | <b>S</b> : 58, 78, 80, 99<br><b>T</b> : 54           | cAMP-dependent protein kinase type II           | Type II regulatory chains mediate membrane association by binding to anchoring proteins, including the MAP2 kinase. Phosphorylated by the activated catalytic chain.                                   |
| 5 | 12.4                       | 42                  | <a href="#">Q9UQ35</a> | (K)AQtPPGPSLsGSKSPCPQEK (S)                                           | S1010s<br>T1003t                                | <b>S</b> (partial report) : 250, 358, 1010,          | Serine/arginine repetitive matrix protein 2     | Part of pre- and post-splicing multiprotein mRNP complexes. May be involved in pre-mRNA                                                                                                                |

|    |       |    |                        |                                   |                  |                                                                                                         |                                           |                                                                                                                                                                                    |
|----|-------|----|------------------------|-----------------------------------|------------------|---------------------------------------------------------------------------------------------------------|-------------------------------------------|------------------------------------------------------------------------------------------------------------------------------------------------------------------------------------|
|    | 11.08 |    |                        | (R)sGSsQELDVKPSASPQER(S)          | S1539s<br>S1542s | 2740; not included 1539, 1542<br>T (partial report) : 1003, 2738<br>Y : 145, 996, 2693                  |                                           | processing events. Binds to RNA. Phosphorylated upon DNA damage, probably by ATM or ATR.                                                                                           |
| 6  | 11.33 | -  | <a href="#">O60609</a> | (R)SLGNyELDVSPYEDTVTSKPWKMNLSK(L) | Y129y            | Not Reported (NR)                                                                                       | GDNF family receptor alpha-3              | Receptor for the glial cell line-derived neurotrophic factor, ARTN (artemin). Mediates the artemin-induced autophosphorylation and activation of the RET receptor tyrosine kinase. |
| 7  | 11.27 | 38 | <a href="#">Q15085</a> | (R)LSsLSSLGDSAPERKSPSHHR (Q)      | S14s             | S : 245, 251, 255, 663, 1155, 1295, 1300, 1457, 1458, 1480, 1489, 1491<br>T : 254, 668, 672, 1462, 1475 | Rho guanine nucleotide exchange factor 11 | Acts as guanine nucleotide exchange factor (GEF) for RhoA GTPase and may act as GTPase-activating protein (GAP) for GNA12 and GNA13.                                               |
| 8  | 11.26 | 44 | <a href="#">Q15185</a> | (K)DWEDDsDEDMSNFDR(F)             | S113s            | S : 113, 118, 148, 151                                                                                  | Prostaglandin E synthase 3                | Molecular chaperone that localizes to genomic response elements in a hormone-dependent manner and disrupts receptor-mediated transcriptional activation.                           |
| 9  | 11.22 | -  | <a href="#">P08910</a> | (R)CLNLKsPTAPPDLYFQDSGLsRFLK(S)   | S37s S52s        | NR                                                                                                      | Abhydrolase domain-containing protein 2   | May play a role in smooth muscle cells migration                                                                                                                                   |
| 10 | 11.12 | 47 | <a href="#">Q14247</a> | (K)TQIPPVsPAPQPTEER(L)            | S405s<br>T401t   | S : 113, 117, 215, 334, 405, 417, 418<br>T : 399, 401, 411<br>Y : 141, 154, 421, 446, 453               | Src substrate cortactin                   | May contribute to the organization of cell structure. Tyrosine phosphorylation in transformed cells may contribute to cellular growth regulation and transformation.               |

|    |       |    |                        |                                                                                                            |                                                                                                |                                                                                                                                                                             |                                                            |                                                                                                                                                                                               |
|----|-------|----|------------------------|------------------------------------------------------------------------------------------------------------|------------------------------------------------------------------------------------------------|-----------------------------------------------------------------------------------------------------------------------------------------------------------------------------|------------------------------------------------------------|-----------------------------------------------------------------------------------------------------------------------------------------------------------------------------------------------|
| 11 | 11.06 | 59 | <a href="#">P46821</a> | (K)VLsPLRsPPLIGsEsAYESFLSADDK(A)<br>-----<br>(K)LGDVsPtQIDVSQFGSFK(E)<br>-----<br>(R)EsSPLYsPTFSDSTSAVK(E) | S1396s<br>S1400s<br>S1406s<br>S1408s<br>-----<br>S1501s<br>T1503t<br>-----<br>S1792s<br>S1797s | <b>S</b> (partial) : 336,<br>1396, 1400,<br>1408, 1501,<br>1792, 1797,<br>2289<br><b>T</b> (partial) :<br>527, 1282,<br>2334<br><b>Y</b> (partial) :<br>1062, 1762,<br>2025 | Microtubule-<br>associated protein<br>1B (MAP 1B)          | The function is essentially unknown. Phosphorylated MAP1B may involve in the cytoskeletal changes that accompany neurite extension. Phosphorylated upon DNA damage, probably by ATM or ATR.   |
| 12 | 10.85 | 38 | <a href="#">Q96JZ2</a> | (R)GYtDPCVATSLKsPSQPQAPKDR(K)                                                                              | S276s<br>T266t                                                                                 | NR                                                                                                                                                                          | Hematopoietic SH2<br>domain-containing<br>protein          | May modulate any apoptotic response because it can affect mitochondrial stability. It is an adapter protein associated with tyrosine kinase signaling. May be phosphorylated by FES and ACK1. |
| 13 | 10.83 | 40 | <a href="#">Q8NEA6</a> | (R)LGLISPPAsQVSTACNQIsPSLQR(A)                                                                             | S13s S23s                                                                                      | NR                                                                                                                                                                          | Zinc finger protein<br>GLIS3                               | Acts as both a repressor and activator of transcription.                                                                                                                                      |
| 14 | 10.72 | 38 | <a href="#">Q9NT68</a> | (K)VPWSLKNSSIDsGEAEVGR(R)                                                                                  | S448s                                                                                          | <b>S</b> : 523<br><b>Y</b> : 1150                                                                                                                                           | Teneurin-2                                                 | May function as a cellular signal transducer.                                                                                                                                                 |
| 15 | 10.55 | -  | <a href="#">Q9Y2Q0</a> | (R)AEGyEKTDDVSEKTSLADQEEVR(T)                                                                              | Y18y                                                                                           | <b>S</b> : 9, 25, 29<br><b>T</b> : 28<br><b>Y</b> : 269                                                                                                                     | Probable<br>phospholipid-<br>transporting<br>ATPase IA     | May play a role in the transport of aminophospholipids from the outer to the inner leaflet of various membranes and the maintenance of asymmetric distribution of phospholipids.              |
| 16 | 10.48 | -  | <a href="#">Q09019</a> | (R)YHSLGNI sRGGSGGSGSGGEKPSGPVPR(S)                                                                        | S535s                                                                                          | <b>S</b> : 545                                                                                                                                                              | Dystrophia<br>myotonica WD<br>repeat-containing<br>protein | May have a regulatory function in meiosis.                                                                                                                                                    |

|    |       |    |                        |                                        |                  |                                                                                 |                                                           |                                                                                                                                                                        |
|----|-------|----|------------------------|----------------------------------------|------------------|---------------------------------------------------------------------------------|-----------------------------------------------------------|------------------------------------------------------------------------------------------------------------------------------------------------------------------------|
| 17 | 10.43 | 49 | <a href="#">Q9NYF8</a> | (K)SSATSGDIWPLSAYDNsPR (S)             | S222s            | S (partial) : 102, 222, 760<br>T (partial) : 341, 526, 840<br>Y : 284, 408, 511 | Bcl-2-associated transcription factor 1                   | Death-promoting transcriptional repressor.                                                                                                                             |
| 18 | 10.43 | 41 | <a href="#">P25391</a> | (K)SPGTANVLDVNNstLMFVGGLGGQIKKSPAVK(V) | S2245s<br>T2246t | NR                                                                              | Laminin subunit alpha-1                                   | A glycoprotein that most likely affects the organization of cells into tissues during embryonic development by interacting with other extracellular matrix components. |
| 19 | 10.42 | -  | <a href="#">Q6P9A3</a> | (R)IHTGERPYVCMCEGKSFIHsyDR(I)          | S373s<br>Y374y   | NR                                                                              | Zinc finger protein 549                                   | May be involved in transcriptional regulation.                                                                                                                         |
| 20 | 10.4  | 50 | <a href="#">Q15365</a> | (K)QICLVMLETSLSQsPQGR(V)               | S173s            | S : 173, 189, 190, 246, 262, 263, 264                                           | Poly(rC)-binding protein 1 (Alpha-CP1)                    | Single-stranded nucleic acid binding protein that binds preferentially to oligo dC and lowers poly(rC)-binding activity.                                               |
| 21 | 10.36 | -  | <a href="#">Q7Z5N4</a> | (R)VIQTLQAPPDVAPtSVTVRTASETSLRLR(W)    | T1178t           | NR                                                                              | Protein sidekick-1                                        | Cell adhesion protein that guides axonal terminals to specific synapses in developing neurons.                                                                         |
| 22 | 10.25 | 44 | <a href="#">P52292</a> | (R)NVSSFPDDATsPLQENR(N)                | S62s             | S : 24, 62, 490<br>T : 3, 9, 61                                                 | Importin alpha-2 subunit                                  | An adapter protein to nuclear receptor KPNB1 for nuclear protein import.                                                                                               |
| 23 | 10.25 | 40 | <a href="#">Q9HCP6</a> | (-) MGIKtALPAAELGLYSLVLSGALAYAGR(G)    | T5t<br>Y25y      | NR                                                                              | Protein-cysteine N-palmitoyltransferase HHAT-like protein | Negatively regulates N-terminal palmitoylation of SHH by HHAT/SKN .                                                                                                    |
| 24 | 10.12 | 61 | <a href="#">Q99102</a> | (K)sLEPFTLEILARsAKIGLASALQPR(T)        | S1763s<br>S1775s | NR                                                                              | Mucin-4                                                   | Associated with a possible role in tumor progression. This may be because apoptosis is repressed rather than cell proliferation                                        |
| 25 | 10.09 | 35 | <a href="#">Q9HBF4</a> | (R)RHPVTVyNVsNLQESLEAEEMDEETK(R)       | S124s<br>Y121y   | NR                                                                              | Zinc finger FYVE domain-containing protein 1              | Binds to phosphatidylinositol-3-phosphate (PtdIns3P) through its FYVE-type zinc finger.                                                                                |

|    |       |    |                        |                                    |                |              |                                                                                |                                                                                                                                                                                  |
|----|-------|----|------------------------|------------------------------------|----------------|--------------|--------------------------------------------------------------------------------|----------------------------------------------------------------------------------------------------------------------------------------------------------------------------------|
| 26 | 10.02 | 48 | <a href="#">Q86YT6</a> | (R)VQQIYSDSDLKVEVCGTSWTyNPAAVsK(V) | S398s<br>Y392y | NR           | E3 ubiquitin-protein<br>ligase MIB1                                            | Positively regulates the Delta-<br>mediated Notch signaling by<br>ubiquitinating the intracellular<br>domain of Delta, leading to<br>endocytosis of Delta receptors.             |
| 27 | 9.82  | 34 | <a href="#">Q9UDY8</a> | (K)RALTDPIQGTEySAESLVRNLQWAK(A)    | Y569y          | S : 135      | Mucosa-associated<br>lymphoid tissue<br>lymphoma<br>translocation<br>protein 1 | Has ubiquitin ligase activity.<br>Enhances BCL10-induced<br>activation of NF-kappa-B.<br>Involved in nuclear export of<br>BCL10.                                                 |
| 28 | 9.75  | 46 | <a href="#">Q96MP8</a> | (R)CYEDTMLAAMFSGRHyIPTDsEGR(Y)     | S91s<br>Y86y   | S : 162, 163 | BTB/POZ domain-<br>containing protein<br>KCTD7                                 | Cause progressive myoclonic<br>epilepsy type 3 (EPM3) if defects<br>in KCTD.                                                                                                     |
| 29 | 9.73  | 43 | <a href="#">Q8IWB6</a> | (R)sQFPVLHMEVIVHLLLQISDALR(Y)      | S343s          | NR           | Testis-expressed<br>protein 14                                                 | May be required for normal<br>structure of the intercellular<br>bridge that connects<br>spermatocytes and<br>spermatogonia. Has no protein<br>kinase activity (in vitro)         |
| 30 | 9.66  | 42 | <a href="#">Q86U17</a> | (R)HQLsEPAPAYHRItPTITNFALRLYK(E)   | S41s<br>T51t   | NR           | Serpin A11                                                                     | Glycoprotein                                                                                                                                                                     |
| 31 | 9.63  | 47 | <a href="#">Q9ULC6</a> | (K)tWRWGPEGyGAILLVNCDR (D)         | T138t<br>Y146y | NR           | Protein-arginine<br>deiminase type-1                                           | Catalyzes the deimination of<br>arginine residues of proteins                                                                                                                    |
| 32 | 9.61  | 36 | <a href="#">Q58A45</a> | (K)SSNFGYITsCYKAVNsKDDLPHYCLR(R)   | S359s<br>S366s | NR           | PAB-dependent<br>poly(A)-specific<br>ribonuclease<br>subunit 3                 | Functions in cytoplasmic mRNA<br>decay. As part of the Pan<br>nuclease complex, recruits<br>polyadenylate-binding protein<br>which in turn stimulates PAN2<br>nuclease activity. |
| 33 | 9.46  | -  | <a href="#">Q8TAK6</a> | (K)LSKIATLLLARNyILLGSLQELR(R)      | S166s<br>Y160y | NR           | Oligodendrocyte<br>transcription factor<br>1 (Oligo1)                          | Promotes formation and<br>maturation of oligodendrocytes.<br>Cooperates with OLIG2 to<br>establish the pMN domain of the<br>embryonic neural tube                                |

|    |      |    |                        |                                                                                         |                                     |                                                                           |                                                      |                                                                                                                                                                                                                                                                         |
|----|------|----|------------------------|-----------------------------------------------------------------------------------------|-------------------------------------|---------------------------------------------------------------------------|------------------------------------------------------|-------------------------------------------------------------------------------------------------------------------------------------------------------------------------------------------------------------------------------------------------------------------------|
| 34 | 9.38 | 46 | <a href="#">Q96AY2</a> | (R)RAGPSEDREDWVEEPtVLVLLR(A)                                                            | T311t                               | <b>S</b> : 12, 15, 84, 85, 87, 111, 117<br><b>T</b> : 150                 | Crossover junction endonuclease EME1                 | Interacts with MUS81 to form a DNA structure-specific endonuclease. May be required in mitosis for the processing of stalled or collapsed replication forks.                                                                                                            |
| 35 | 9.29 | -  | <a href="#">Q60733</a> | (K)GDGEILVELVQYCHtQMDVTDyK(G)                                                           | T177t<br>Y184y                      | <b>S</b> : 587                                                            | 85 kDa calcium-independent phospholipase A2          | Catalyzes the release of fatty acids from phospholipids. May participate in fas mediated apoptosis and in regulating transmembrane ion flux in glucose-stimulated B-cells. Has a role in cardiolipin (CL) deacylation.                                                  |
| 36 | -    | 80 | <a href="#">Q00193</a> | (R)SAsPDDDLGSSNWEAADLGNEER(K)                                                           | S17s                                | <b>S</b> : 15, 17, 25, 105, 132, 136, 138, 140, 142, 147<br><b>Y</b> : 84 | Small acidic protein                                 | Phosphoprotein with acetylation                                                                                                                                                                                                                                         |
| 37 | -    | 72 | <a href="#">P26232</a> | (R)tPEELEDDsDFEtEDFDVR(S)<br>-----<br>(R)TLAVERLLEPLVTQVTTLVNTNSKGP <sub>s</sub> NK(K ) | S640s<br>T632t<br>T644t<br><br>S47s | <b>S</b> : 6, 151, 262, 640, 654, 901<br><b>T</b> : 5, 261, 653, 65       | Catenin alpha-2                                      | May function as a linker between cadherin adhesion receptors and the cytoskeleton to regulate cell-cell adhesion and differentiation in the nervous system. Regulates morphological plasticity of synapses and cerebellar and hippocampal lamination during development |
| 38 | -    | 70 | <a href="#">Q13765</a> | (K)VQGEAVSNIQENTQtPtVQEEsEEEEVDEtGVEVK(D)                                               | S166s<br>T159t<br>T161t<br>T174t    | <b>S</b> : 43, 166, 186, 191<br><b>T</b> : 92, 159, 161                   | Nascent polypeptide-associated complex subunit alpha | Prevents inappropriate targeting of non-secretory polypeptides to the endoplasmic reticulum (ER). May act as a specific coactivator for JUN. Phosphorylated upon DNA damage, probably by ATM or ATR.                                                                    |

|    |   |    |                        |                                                                   |                |                                                                                          |                                 |                                                                                                                                                                                                       |
|----|---|----|------------------------|-------------------------------------------------------------------|----------------|------------------------------------------------------------------------------------------|---------------------------------|-------------------------------------------------------------------------------------------------------------------------------------------------------------------------------------------------------|
| 39 | - | 66 | <a href="#">P35221</a> | (R)TPEELDDsDFETEDFDVR(S)                                          | S641s          | <b>S</b> : <u>641</u> , 652, 655<br><b>T</b> : 645, 654, 658<br><b>Y</b> : 177, 691      | Catenin alpha-1                 | Associates with the cytoplasmic domain of a variety of cadherins. May play a crucial role in cell differentiation.                                                                                    |
| 40 |   | 53 | <a href="#">P05387</a> | (K)KEEsEEsDDDMGFGLFD(-)                                           | S102<br>S105s  | <b>S</b> : 16, 17, 79, 86, <u>102</u> , <u>105</u>                                       | 60S acidic ribosomal protein P2 | Plays an important role in the elongation step of protein synthesis                                                                                                                                   |
| 41 | - | 49 | <a href="#">P29692</a> | (K)KPA <sup>t</sup> PAEDDED <sup>DD</sup> IDLFGsDNEEEDKEAAQLR (E) | S162s<br>T147t | <b>S</b> : 60, 119, 133, <u>162</u><br><b>T</b> : 129, <u>147</u>                        | Elongation factor 1-delta       | stimulate the exchange of GDP bound to EF-1-alpha to GTP. Phosphorylated upon DNA damage, probably by ATM or ATR                                                                                      |
| 42 | - | 48 | <a href="#">Q13895</a> | (R)MPQDGsDDEDEEWPTLEK(A)                                          | S98s           | <b>S</b> : <u>98</u> , 167                                                               | Bystin                          | Required for processing of 20S pre-rRNA precursor and biogenesis of 40S ribosomal subunits. May be required for trophinin-dependent regulation of cell adhesion during implantation of human embryos. |
| 43 | - | 44 | <a href="#">Q08945</a> | (K)EGMNPSYDEYADsDEDQHDAYLER(M)                                    | S444s          | <b>S</b> (partial) : 437, <u>444</u> , 688<br><b>T</b> : 170<br><b>Y</b> : 311, 441, 554 | FACT complex subunit SSRP1      | a general chromatin factor that acts to reorganize nucleosomes                                                                                                                                        |

\* Access numbers are active links allowing access to the full information provided by UniprotKB.

\*\* Variable site(s) newly found in this study are labeled in green, while those found in this study and also reported by UniprotKB, are given in orange.

\*\*\* The sites underline in column G are to show coincidence with those reported by UniprotKB.
